1 *Proposed journal section: Research reports*

2

3 **Neuronal responses support a role for orbitofrontal cortex in**  
4 **cognitive set reconfiguration**

5

6 Brianna J. Sleezer, Giuliana Loconte, Meghan D. Castagno, and Benjamin Y. Hayden  
7 Department of Brain and Cognitive Sciences,  
8 Center for Visual Science and Center for the Origins of Cognition  
9 University of Rochester

10

11 **Corresponding author:**

12 Benjamin Y. Hayden  
13 Department of Brain and Cognitive Sciences  
14 University of Rochester  
15 Rochester, NY 14618  
16 E-mail: [benhayden@gmail.com](mailto:benhayden@gmail.com)

17

18 **Running title:** Cognitive set reconfiguration in OFC

19 **Counts:** pages (39); figures (5); tables (0); equations (3)

20 **Words:** manuscript (9819); Abstract (185)

21 **Keywords:** switching; executive control; rule; wisconsin card sorting task; rhesus  
22 macaque

23

## ABSTRACT

24

25

26

27

28

29

30

31

32

33

34

35

36

37

38

We are often faced with the need to abandon no-longer beneficial rules and adopt new ones. This process, known as cognitive set reconfiguration, is a hallmark of executive control. Although cognitive functions like reconfiguration are most often associated with dorsal prefrontal structures, recent evidence suggests that the orbitofrontal cortex (OFC) may play an important role as well. We recorded activity of OFC neurons while rhesus macaques performed a version of the Wisconsin Card Sorting Task that involved a trial-and-error stage. OFC neurons demonstrated two types of switch-related activity, an early (switch-away) signal and a late (switch-to) signal, when the new task set was established. We also found a pattern of *match modulation*: a significant change in activity for the stimulus that matched the current rule (and would therefore be selected). These results extend our understanding of the executive functions of the OFC. They also allow us to directly compare OFC with complementary datasets we previously collected in ventral (VS) and dorsal (DS) striatum. Although both effects are observed in all three areas, the timing of responses aligns OFC more closely with DS than with VS.

39

## INTRODUCTION

40           The orbitofrontal cortex (OFC) is a critical site for decision-making and adaptive  
41 behavior. Its contributions to the evaluation and comparison of rewards are well  
42 established (Padoa-Schioppa and Assad, 2006; Wallis, 2007). Perhaps less well-known  
43 are its executive roles. OFC is critical for linking stimuli to values, in monitoring  
44 consequences of actions, in detecting and resolving conflict, in metacognition, and  
45 encoding rules and storing sensory information in working memory (Abe and Lee, 2011;  
46 Kepecs et al., 2008; Lara et al., 2009; Mansouri et al., 2014; Rushworth et al., 2011;  
47 Schoenbaum et al., 1999; Sleezer et al., 2016; Strait et al., 2016; Tsujimoto et al., 2009;  
48 Wallis and Miller, 2003; Wallis et al., 2001). Indeed, the list of executive functions of the  
49 OFC is almost as long as those associated with classical executive structures like  
50 dorsolateral prefrontal cortex (DLPFC) and dorsal anterior cingulate cortex (dACC).

51           One executive function for which the role of OFC is not as well understood is  
52 cognitive set reconfiguration. This term refers to the adjustment of cognitive strategies or  
53 mental representations in response to changing goals or environmental circumstances  
54 (Robbins, 2007). It is often called switching for short. A classic example of switching is  
55 recognizing that a familiar driving route to work is blocked and identifying and changing  
56 to an alternative route. Switch-related signaling is a classic executive function and is most  
57 closely associated with executive regions in the dorsal prefrontal cortex and parietal  
58 cortex (Alan et al., 1994; Dias et al., 1996a; Kamigaki et al., 2012; Mansouri et al., 2006).  
59 Specific evidence for this linkage comes, in part, from physiological studies showing  
60 systematic modulations of firing rate during switch trials relative to other trials.

61           Although a number of studies suggest that OFC contributes to simpler types of  
62 flexible decision-making (Dias et al., 1996a, 1996b, 1997; McAlonan and Brown, 2003),  
63 there are several reasons to believe that OFC may participate directly in switching,  
64 especially between rules. First, as noted above, recent evidence supports a role for OFC  
65 in many executive functions. Second, we and others have delineated a role for OFC in  
66 maintenance of rules or in updating based on rules (Buckley et al., 2009; Sleezer et al.,  
67 2016; Tsujimoto et al., 2011; Wallis et al., 2001; Yamada et al., 2010). Third, recent  
68 work indicates that OFC lesions disrupt the ability to switch between behavioral rules in  
69 rodents (Birrell and Brown, 2000). Finally, we previously showed switching-related  
70 activity in two basal ganglia structures - the dorsal (DS) and ventral (VS) striatum -  
71 which are not generally associated with switching. Specifically, we found that switch  
72 signals in VS were strongest when switching away from previously relevant rules, while  
73 switch signals in DS were strongest when switching toward newly relevant rules.  
74 Because OFC has direct anatomical projections to both VS and DS, we hypothesized that  
75 it may have a direct role in switching as well.

76           In our earlier study on striatal contributions to switching, we also found that the  
77 appearance of switch signals in VS and DS was consistent with the appearance of  
78 associative learning signals (i.e. the systematic enhancement or suppression in firing rate  
79 for task-relevant targets when they appear in a sequence of stimuli) in both regions. We  
80 therefore wondered whether OFC neurons would demonstrate similar patterns of activity.  
81 Such signals likely relate to executive function, as they correspond to a linkage between  
82 mental representations of rules and presentation of specific offers.

83           To examine the role of OFC in switching, we recorded the activity of single  
84 neurons as macaques performed a version of the Wisconsin Card Sorting Task. In our  
85 version, rules were never cued, so subjects had to go through a trial-and-error phase to  
86 determine the currently relevant rule (this normally took 3-4 trials). They could then take  
87 advantage of the newly learned rule and maintain responding until the rule changed again  
88 (blocks were 15 trials long). We found systematic changes in firing associated with both  
89 early (switch-away) and late (switch-to) switch trials - i.e. explicit switch signals - in  
90 OFC neurons. We also found that switch signals in OFC were consistent with the  
91 appearance of associative learning signals in this region; associative signals arose slowly  
92 and only became strong once the rule was established. Our results are consistent with the  
93 idea that switch signals are linked to associative learning, and may even serve to initiate  
94 learning processes during flexible rule updating. More generally, these findings endorse a  
95 broader executive role for OFC and are consistent with a recent theory proposing that  
96 OFC instantiates a cognitive map of task space (Schuck et al., 2016; Wilson et al., 2014).

97 **MATERIALS AND METHODS**

98 ***Surgical procedures:*** All animal procedures were approved by the University  
99 Committee on Animal Resources at the University of Rochester and were designed and  
100 conducted in compliance with the Public Health Service's Guide for the Care and Use of  
101 Animals. Two male rhesus macaques (*Macaca mulatta*) served as subjects. We used  
102 standard electrophysiological techniques as described previously (Strait et al., 2014). A  
103 small prosthesis for holding the head was used. Animals were habituated to laboratory  
104 conditions and then trained to perform oculomotor tasks for liquid reward. A Cilux  
105 recording chamber (Crist Instruments) was placed over the OFC. Position was verified by  
106 magnetic resonance imaging with the aid of a Brainsight system (Rogue Research Inc.).  
107 Animals received appropriate analgesics and antibiotics after all procedures. Recording  
108 locations are shown in **Figure 1C**. Throughout both behavioral and physiological  
109 recording sessions, the chamber was kept sterile with regular antibiotic washes and sealed  
110 with sterile caps.

111 ***Recording sites:*** We approached OFC through a standard recording grid (Crist  
112 Instruments). We used the standard atlas for all area definitions (Paxinos et al., 2000). We  
113 defined OFC as the coronal planes situated between 29 and 36 mm rostral to the  
114 interaural plane, the horizontal planes situated between 0 and 9 mm from the ventral  
115 surface, and lateral to the medial orbital sulcus. We recorded from Area 13m (Öngür and  
116 Price, 2000). We confirmed recording locations before each recording session using our  
117 Brainsight system with structural magnetic resonance images taken before the  
118 experiment. Neuroimaging was performed at the Rochester Center for Brain Imaging, on  
119 a Siemens 3T MAGNETOM Trio Tim using 0.5 mm voxels. We confirmed recording

120 locations by listening for characteristic sounds of white and gray matter during recording,  
121 which in all cases matched the loci indicated by the Brainsight system. The Brainsight  
122 system typically offers an error of <1 mm in the horizontal plane and <2 mm in the z-  
123 direction.

124 ***Electrophysiological techniques:*** Single electrodes (Frederick Haer & Co.,  
125 impedance range 0.8 to 4M  $\Omega$ ) were lowered using a microdrive (NAN Instruments) until  
126 waveforms between 1 and 3 neuron(s) were isolated. Individual action potentials were  
127 isolated on a Plexon system (Plexon Inc., Dallas, TX). Neurons were selected for study  
128 solely on the basis of the quality of isolation; we never pre-selected based on task-related  
129 response properties.

130 ***Eye-tracking and reward delivery:*** Eye position was sampled at 1000 Hz by an  
131 infrared eye-monitoring camera system (SR Research). Stimuli were controlled by a  
132 computer running Matlab (Mathworks) with Psychtoolbox and Eyelink Toolbox. Visual  
133 stimuli were presented on a computer monitor placed 57 cm from the animal and centered  
134 on its eyes. A standard solenoid valve controlled the duration of juice delivery. The  
135 relationship between solenoid open time and juice volume was established and confirmed  
136 before, during, and after recording.

137 ***Behavioral task:*** The task described here is the same as that used in two previous  
138 manuscripts (Sleezer and Hayden, 2016; Sleezer et al., 2016). Subjects performed an  
139 implementation of the Wisconsin Card Sorting Task (WCST, Moore et al., 2005). Our  
140 version of the task uses two dimensions (color and shape) and six specific rules (three  
141 shapes: circle, star, and triangle, and three colors: cyan, magenta, and yellow, **Figure**  
142 **1A**). On each trial, three stimuli were presented asynchronously at the top, bottom left,

143 and bottom right of the screen (1 second asynchrony). The color, shape, position, and  
144 order of stimuli were fully randomized on each trial. Each stimulus was presented for 400  
145 ms and was followed by a 600 ms blank period. Subjects were free to fixate upon the  
146 stimuli when they appeared. Then all three stimuli reappeared simultaneously with a  
147 central fixation spot. The subject fixated on the central spot for 100 ms and then indicated  
148 its choice by shifting gaze to its preferred stimulus and maintaining fixation on it for 250  
149 ms. Failure to maintain gaze for 250 ms did not lead to the end of the trial, but instead  
150 returned the subject to a choice state; thus, subjects were free to change their mind if they  
151 did so within 250 ms (although in our observations, they almost never did so). Following  
152 a successful 250 ms fixation, visual feedback was provided (a green/red outline around  
153 the chosen stimulus for correct/incorrect choices, respectively). After visual feedback,  
154 there was a 500 ms blank delay period; correct choices were followed by a liquid (water)  
155 reward. All trials were separated by an 800 ms inter-trial interval (ITI), which we refer to  
156 as the preparatory period. In each block, subjects responded according to one of the six  
157 rules. Subjects were required to use a trial-and-error learning process to determine the  
158 correct rule. Rule changes occurred after 15 correct trials and were not explicitly cued.

159 *Analysis of behavioral performance across different types of rule changes:* To  
160 determine whether subjects' performance differed depending on the type of rule change  
161 that occurred at the beginning of the block, we calculated the average number of trials  
162 monkeys completed prior to rule acquisition (i.e. the first trial in a series of four  
163 consecutive correct trials, Sleezer and Hayden, 2016) following intra-dimensional and  
164 extra-dimensional rule changes. Intra-dimensional rule changes refer to instances when  
165 the rule change occurs within one rule category (i.e. color to color or shape to shape),



166 while extra-dimensional rule changes refer to instances when the rule change occurs  
167 across rule categories (i.e. color to shape or shape to color). To compare the number of  
168 trials monkeys completed prior to rule acquisition across intra-dimensional and extra-  
169 dimensional switches, we used a two-way repeated measures ANOVA with the between  
170 subjects factor subject (Monkey B, Monkey C) and the within subjects factor block type  
171 (intra-dimensional, extra-dimensional). We used post-hoc Fisher's LSD tests to compare  
172 specific differences across groups.

173 *Analysis of switch-related neural activity:* On the first trial of each block,  
174 subjects almost always chose according to the previously relevant rule. Because the block  
175 transition was not explicitly cued, we called this the "inevitable error trial". On blocks  
176 where the new rule happened to match the previous one by chance (1/6 of blocks), the  
177 first trial did not produce an error, and monkeys did not change strategy, so, for purposes  
178 of analysis, we treated these blocks as 30 trial blocks. Moreover, because there were three  
179 stimuli on each trial, with two dimensions each, occasionally (1/3 of blocks), the correct  
180 stimulus on the first trial was consistent with the previously relevant rule. We therefore  
181 specified in our definition of the inevitable error trial that it referred to the first trial on  
182 which choosing according to the previous rule would produce an error.

183 We examined switch-related neural activity during the 1,420 ms post-feedback  
184 period following feedback (that is, the combined duration of the delay, reward, and  
185 preparatory periods) and prior to the start of switch and non-switch trials. We analyzed  
186 this period because monkeys likely reconfigured their cognitive rule set on switch trials  
187 during this period. Non-switch trials were defined as all trials other than switch trials. The  
188 two types of switch trials are defined below.

189           We identified two points in the block when monkeys likely reconfigured (i.e.  
190 switched) their cognitive rule set. The *early switch* was the post-feedback period  
191 following an incorrect choice and immediately prior to the start of the first correct trial.  
192 We chose this trial because subjects had switched but had not yet begun consistently  
193 responding according to the new rule. We excluded early switch points that were also  
194 identified as late switch points. The *late switch point* was on the trial immediately  
195 following the first trial of at least 4 consecutive correct trials.

196           Task-related activity during the post-feedback period was determined using  
197 ANOVA with the factors trial type (switch or nonswitch), block type (intradimensional or  
198 extradimensional), trial outcome (reward or no-reward), and next trial outcome (reward  
199 or no-reward). In these analyses, trial outcome refers to the outcome during the reward  
200 period during the post-feedback period, while next trial outcome refers to the outcome  
201 during the reward period on the following trial. Although we were interested in the  
202 effects of trial type, block type, and their interaction, we included trial outcome and next  
203 trial outcome in the ANOVA model to control for the potential influence of reward or  
204 error related activity. Because current trial outcome and next trial outcome were not fully  
205 crossed with trial type in this model (that is, switch trials always consisted of a non-  
206 rewarded trial followed by a rewarded trial), we used a nested ANOVA in which current  
207 and next trial outcome were nested in trial type. A nested ANOVA measures the effects  
208 of a factor while partialling out the effects of a nesting factor. Thus, by utilizing a nested  
209 ANOVA in which current and next trial outcome were nested in trial type, this model  
210 includes an estimate of the effects of current and next trial outcome, which thus serves as  
211 control for reward outcome related effects. We conducted these analyses separately for

212 early and late switch points. Based on the ANOVA results, we classified task-related  
213 activity into two types. The first type showed a significant main effect ( $P < 0.05$ ) of trial  
214 type, the second showed a significant interaction ( $P < 0.05$ ) between trial type and block  
215 type. Post-hoc comparisons (Fisher's LSD test) were conducted if the interaction was  
216 significant ( $P < 0.05$ ). We refer to neurons with a main effect of trial type as *general*  
217 *switch signaling neurons* and neurons with an interaction between trial type and block  
218 type as *context-specific switch signaling neurons*.

219 To determine if the proportion of cells demonstrating a significant switch-related  
220 effect (a main effect of trial type or a significant interaction between trial type and block  
221 type) was significantly above chance, we conducted binomial tests, and adjusted the p-  
222 value using a Bonferroni correction for two comparisons. We corrected for two  
223 comparisons because we analyzed activity at both early and late switch points. We chose  
224 to maintain an alpha of 0.05 and multiply the resultant p-values by two as a way of  
225 implementing the Bonferroni correction. Thus, the p-values reported for binomial tests in  
226 this paper have been adjusted for two comparisons, where appropriate. To determine if  
227 proportions of cells demonstrating an effect were significantly different across OFC, VS  
228 and DS, we implemented a mixed model binary logistic regression procedure using the  
229 between subjects factor brain region (OFC, VS, DS) and the within subjects factors trial  
230 period (early, late) and modulation type (general switch, context dependent switch). The  
231 model was fit using a generalized estimating equation (GEE) procedure, implemented in  
232 SPSS. In this analysis, "within subjects" and "between subjects" refer to neurons. In this  
233 procedure, an omnibus Wald Chi-Square test was applied to determine the significance of

234 group effects, followed by pairwise comparisons using Fisher's LSD tests to examine  
235 specific group effects.

236 To examine the percent of variance explained by each switch-related effect across  
237 the populations of OFC, VS and DS neurons, we calculated the average partial  $\eta^2$ . Partial  
238  $\eta^2$  is a measure of effect size in ANOVA, which measures the proportion of variance  
239 attributable to a factor after partialling out other factors from the non-error variance  
240 (Cohen, 1973). Partial  $\eta^2$  is calculated as:

$$\text{Partial } \eta^2 = \frac{SS_{\text{factor}}}{(SS_{\text{factor}} + SS_{\text{error}})}$$

241 where  $SS_{\text{factor}}$  is the variation attributable to the factor (sum of squares for the factor), and  
242  $SS_{\text{error}}$  is the error variation (sum of squares error). To compare the average partial  $\eta^2$  for  
243 switch-related effects at early and late switch points and in OFC, VS and DS, we used a  
244 two-way repeated measures ANOVA with the factors brain region (OFC, VS and DS)  
245 and switch period (early and late), followed by post-hoc Fisher's LSD tests.

246 ***Analysis of Associative Learning-Related Activity:*** To examine associative  
247 learning-related neural activity, we calculated the average firing rate during each of the  
248 three stimulus presentation epochs on all correct trials. We defined the stimulus  
249 presentation epoch as the 1000 ms period consisting of 400 ms when the stimulus was on  
250 the screen and the following 600 ms when the stimulus was off the screen. We then used  
251 two-way t-tests to compare the average firing rate during epochs in which the correct  
252 stimulus was presented to the average firing rate during epochs in which the correct  
253 stimulus was not presented.

254 To examine the magnitude of correct-stimulus selectivity, we calculated Hedge's  
255  $g$ , a measure of effect size similar to Cohen's  $d$ . Hedge's  $g$  is recommended when groups

256 have different sizes, and was also developed to remove a positive bias affecting Cohen's  
257 d (Hedges, 1981). Since the sample sizes for the presentation of incorrect stimuli were  
258 always larger than the sample sizes for the presentation of correct stimuli (since each trial  
259 consisted of one correct stimulus and two incorrect stimuli), we chose to calculate effect  
260 size using Hedge's *g*, rather than Cohen's *d*. Hedge's *g* is calculated as:

261

$$\text{Hedges } g = \frac{M1 - M2}{SD_{pooled}}$$

262

263 where *M1* and *M2* are the means of each group, and *SD*<sub>pooled</sub> is the pooled standard  
264 deviation, calculated as:

265

$$SD_{pooled} = \sqrt{\frac{(n_1 - 1)SD_1^2 + (n_2 - 1)SD_2^2}{n_1 + n_2 - 2}}$$

266

267 where *n*<sub>1</sub> and *n*<sub>2</sub> are the sample sizes for each group, and *SD*<sub>1</sub> and *SD*<sub>2</sub> are the standard  
268 deviations for each group.

269 To compare selectivity across brain regions, we first determined the average time  
270 of maximum selectivity within trials in each region (averaged across all correct trials) and  
271 analyzed a 200 ms period surrounding that time (100 ms before and 100 ms after). We  
272 then used these analysis epochs to compare selectivity in OFC, VS, and DS before and  
273 after late switch points. We compared selectivity across switch periods and brain regions  
274 using a 2-way repeated-measures ANOVA with the factors switch period (pre-late switch

275 and post-late switch) and brain region (OFC, VS, and DS), following by post-hoc  
276 Fisher's LSD tests.

277 Statistical analyses were carried out using MATLAB release 2012b (MathWorks  
278 Inc), SPSS Statistics version 24 (IBM Analytics), and GraphPad Prism version 6  
279 (GraphPad Software).

## 280 RESULTS

### 281 *Behavioral Performance*

282 After a 2-3 month period of training, both subjects were able to reliably learn new  
283 rules and maintain a high level of accuracy once new rules were acquired (**Figure 2A**).  
284 Once training was complete, we collected data during 78 individual OFC recording  
285 sessions ( $n = 35$  sessions for subject B and  $n = 43$  sessions for subject C). Subjects  
286 completed an average of  $565.09 \pm 12.57$  (mean  $\pm$  sem) trials per session and an average  
287 of  $30.92 \pm 0.83$  blocks per session.

288 On each block (besides the first block of each session), subjects completed either  
289 an intradimensional (ID) or extradimensional (ED) switch to the new rule. To determine  
290 whether subjects' performance differed following intradimensional and extradimensional  
291 rule changes, we examined the number of trials monkeys completed prior to rule  
292 acquisition following intra-dimensional and extra-dimensional rule changes using a two-  
293 way repeated measures ANOVA with the between subjects factor subject (Monkey B,  
294 Monkey C) and the within subjects factor block type (intra-dimensional, extra-  
295 dimensional). This analysis revealed a significant main effect of subject ( $F(1,267) =$   
296  $75.70$ ;  $P < 0.0001$ ) and of block type ( $F(1,267) = 136.2$ ;  $P < 0.0001$ ), but no interaction  
297 between the two ( $F(1,267) = 0.7783$ ;  $P = 0.3785$ ). The results of our post-hoc  
298 comparisons are shown in **Figure 2B**. We found that both subjects completed more trials  
299 prior to rule acquisition following extra-dimensional rule changes compared to intra-  
300 dimensional rule changes (**Figure 2B**,  $P < 0.0001$  for both subjects, Fisher's LSD Tests).

301 On average, subjects completed  $14.94 \pm 5.79$  early switches and  $27.62 \pm 9.53$  late  
302 switches per session. Prior to early switch trials, monkeys completed  $3.12 \pm 0.66$  trials

303 (3.34 ± 0.77 for monkey B and 2.97 ± 0.52 for monkey C), and prior to late switch trials,  
304 monkeys completed an average of 6.69 ± 2.31 (8.04 ± 2.74 for monkey B and 5.74 ± 1.29  
305 for monkey C). These numbers include the inevitable error trial.

306

### 307 *Neurons in the orbitofrontal cortex demonstrate switch-related activity*

308 We first characterized neural responses associated with switch trials. To do this,  
309 we compared firing rates on non-switch trials (all trials besides early- and late-switch  
310 trials) with those obtained on early switch trials (that is, the first correct trial after a  
311 switch). Then, in a separate analysis, we compared non-switch trials with late switch  
312 trials (the first correct trial in a series of at least 4 consecutive correct trials). We analyzed  
313 firing rate activity during the post-feedback period separately for each cell using ANOVA  
314 (see Methods).

315 Our assessment of switch-related activity focused on both preponderance and  
316 effect size during the post-feedback period, measured by the proportion of cells  
317 demonstrating a significant effect and the proportion of variance explained (partial  $\eta^2$ ) by  
318 the main effect of trial type (“general switch” modulation) and the interaction between  
319 trial type and block type (“context-dependent switch” modulation).

320 **Figure 3A** shows an example of an OFC neuron demonstrating general switch-  
321 related activity at both early and late switch points. The average firing rate response for  
322 this neuron was significantly greater on early switch trials than non-switch switch trials  
323 for both ID switches (red line and black dotted line,  $P < 0.0001$ , Fisher’s LSD test) and  
324 ED switches (pink line and gray dotted line,  $P = 0.0015$ , Fisher’s LSD test), and also  
325 significantly greater on late switch trials than non-switch trials for ID switches (dark blue



326 line and black dotted line,  $P < 0.0001$ , Fisher's LSD test) and ED switches (light blue line  
327 and gray dotted line,  $P < 0.0001$ , Fisher's LSD test). This neuron showed no response  
328 difference for ID versus ED switches, whether looking at early switch points (red line and  
329 pink line,  $P = 0.9263$ , Fisher's LSD test), or late switch points (dark blue line and light  
330 blue line,  $P = 0.6720$ , Fisher's LSD test).

331 To determine whether the proportion of OFC cells demonstrating general switch  
332 modulation was above chance, we calculated the average proportion of cells  
333 demonstrating a significant effect across the 1,420 ms post-feedback epoch and  
334 performed binomial tests. We corrected for two comparisons (because we looked at early  
335 and late switch points) using a Bonferroni correction. These results are shown in **Figure**  
336 **4A**. We found that the proportion of cells demonstrating general switch modulation was  
337 significantly above chance at early switch points ( $n = 20/115$  cells) and at late switch  
338 points ( $n = 30/115$  cells,  $P < 0.0001$  in both cases).

339 In a previously published report, we examined the same effects in two striatal  
340 regions, ventral (VS) and dorsal (DS) striatum (Sleezer and Hayden, 2016). Data for VS  
341 and DS are shown as well, for comparison (**Figure 4A**). We found that the number of  
342 cells demonstrating switch modulation in these areas was significant at early switch  
343 points (VS:  $n = 29/97$  cells; DS:  $n = 24/200$  cells, Bonferroni adjusted  $P < 0.0001$  for all  
344 three regions, corrected for two comparisons, binomial test) and at late switch points (VS:  
345  $n = 24/97$  cells; DS:  $n = 41/200$  cells, Bonferroni adjusted  $P < 0.0001$  for all three  
346 regions, corrected for two comparisons).

347 To compare the proportions of cells demonstrating each type of modulation across  
348 brain regions and across early and late switch points, we implemented a mixed model

349 binary logistic regression procedure using the between subjects factor brain region (OFC,  
350 VS, DS) and the within subjects factors trial period (early, late) and modulation type  
351 (general switch, context dependent switch). In this analysis, the terms “within subjects”  
352 and “between subjects” refer to neurons. In this procedure, an omnibus Wald Chi-Square  
353 test was applied to determine the significance of group effects, followed by Fisher’s LSD  
354 tests to examine specific group differences. This analysis revealed a significant main  
355 effect of brain region ( $\chi^2 = 6.4922, P = 0.0389$ ), a significant main effect of modulation  
356 type ( $\chi^2 = 68.3523, P < 0.0001$ ), and a significant interaction between brain region and  
357 trial period ( $\chi^2 = 8.1057, P = 0.0174$ ).

358 Pairwise comparisons are shown in **Figure 4A**. These analyses revealed a  
359 significantly greater proportion of cells demonstrating general switch modulation at late  
360 switch points compare to early switch points in both OFC and DS (OFC:  $P = 0.0461$ , DS:  
361  $P = 0.0090$ , Fisher’s LSD tests). In contrast, we found no difference in the proportion of  
362 cells demonstrating general switch modulation at early and late switch points in VS ( $P =$   
363  $0.3672$ ). However, we did find that the proportion of cells demonstrating general switch  
364 modulation at early switch points was significantly greater in VS compared to both OFC  
365 and DS at the same time point (VS vs. OFC:  $P = 0.0322$ ; VS vs. DS:  $P = 0.0006$ ).

366 **Figure 3B** shows the average proportion of variance explained (partial  $\eta^2$ ) by the  
367 main effect of trial type in OFC across time within trials. **Figures 3C, and 3D** show the  
368 corresponding data in VS, and DS for comparison. To compare the average partial  $\eta^2$   
369 across OFC, VS, and DS, we calculated the average partial  $\eta^2$  across the 1,420 sec post-  
370 feedback epoch and used a mixed-model ANOVA with the between subjects factors brain  
371 region (OFC, VS, and DS), and the within subjects factors trial period (early, late), and

372 modulation type (general switch, context-dependent switch). As above, in this analysis,  
373 “within subjects” and “between subjects” refer to neurons. This analysis revealed a main  
374 effect of brain region ( $F_{(2,409)} = 4.6948$ ,  $P = 0.0096$ ), a main effect of modulation type  
375 ( $F_{(1,409)} = 62.4911$ ,  $P < 0.0001$ ), and an interaction between brain region and trial period  
376 ( $F_{(2,409)} = 9.9800$ ,  $P = < 0.0001$ ). Post-hoc comparisons are shown in **Figure 4B**.

377 We found a greater modulation in OFC at late switch points compared to early  
378 switch points, although this effect was not significant ( $P = 0.0502$ , Fisher’s LSD test). At  
379 early switch points, we found a greater magnitude of general switch modulation in VS  
380 compared to both OFC and DS ( $P = 0.0029$  and  $P < 0.0001$ ), but no difference between  
381 OFC and DS at the same time point ( $P = 0.2482$ ). At late switch points, we found no  
382 difference between any of the three regions (OFC vs. VS:  $P = 0.3027$ ; OFC vs. DS:  $P =$   
383  $0.2694$ ; VS vs. DS:  $P = 0.9174$ ).

384 These results indicate that VS neurons demonstrate greater switch-related  
385 modulation during early periods of trial-and-error learning compared to later periods of  
386 rule acquisition and compared to OFC and DS neurons at the same time point. In  
387 addition, OFC, VS, and DS appear to demonstrate equal levels of switch-related  
388 modulation at later points of rule acquisition, while OFC and DS neurons demonstrate  
389 greater switch-related modulation during later periods of rule acquisition compared to  
390 early periods of trial-and-error learning.

391

### 392 **Latencies of switching signals**

393 We next examined the latency of general switch signal appearance in OFC, VS,  
394 and DS at early and late switch points. None of these analyses were reported in our

395 earlier study (Sleezer et al., 2016). To estimate latency, we calculated the average partial  
396  $\eta^2$  for the main effect of trial type (switch or non-switch) across time within trials using a  
397 50 ms sliding window slid in 10 ms steps across the 1,420 ms post-feedback period. To  
398 determine whether these latencies were significantly different across populations of  
399 neurons, we calculated the time of maximum selectivity across neurons and performed a  
400 one-way ANOVA using the factor brain region (OFC, VS, DS), separately at early and  
401 late switch points. This analysis revealed no significant differences in group latencies  
402 across brain regions at early ( $P = 0.1027$ ) or late switch points ( $P = 0.5793$ ).

403

404 ***Context-specific switch signals arise during the early trial-and-error period in VS, but***  
405 ***not OFC or DS***

406 We next investigated context-specific switching activity (i.e. encoding of switches  
407 specific to either extra- or intra-dimensional switches, but not both). These results are  
408 similar to those reported in our previous paper (Sleezer and Hayden, 2016), however, the  
409 analysis technique used here is more sensitive and the OFC data were not reported in the  
410 previous paper. We found that the proportion of cells demonstrating context-dependent  
411 switch modulation at early switch points was significantly above chance in VS ( $n = 11/97$   
412 cells, Bonferroni adjusted  $P = 0.0067$ , corrected for two comparisons, binomial test), but  
413 not OFC or DS (OFC:  $n = 3/115$  cells, Bonferroni adjusted  $P = 1.6642$ ; DS:  $n = 9/200$   
414 cells, Bonferroni adjusted  $P = 1.0906$ , corrected for two comparisons). At late switch  
415 points, the proportion of cells demonstrating a significant effect was not significant in  
416 OFC, VS, or DS (OFC:  $n = 6/115$  cells, Bonferroni adjusted  $P = 0.7051$ ; VS:  $n = 5/97$   
417 cells, Bonferroni adjusted  $P = 0.7410$ ; DS:  $n = 15/200$  cells, Bonferroni adjusted  $P =$

418 0.0887, corrected for two comparisons). In comparing proportions across brain regions at  
419 early switch points, we found a significantly greater proportion of cells demonstrating  
420 context-dependent switch modulation in VS compared to OFC ( $P = 0.0138$ ) and a greater  
421 proportion of cells in VS compared to DS, which was marginally significant ( $P =$   
422  $0.0542$ ). We found no difference between OFC and DS at early switch points ( $P =$   
423  $0.2033$ ), or between any of the three regions at late switch points (OFC vs. VS:  $P =$   
424  $0.9836$ ; OFC vs. DS:  $P = 0.4128$ ; VS vs. DS:  $P = 0.4241$ ).

425         In comparing the strength of context-dependent switch modulation across early  
426 and late switch points, we found significantly greater modulation in VS at early switch  
427 points compared to late switch points ( $P = 0.0004$ , Fisher's LSD test), but no difference  
428 between the two time points in OFC or DS ( $P = 0.7328$ ,  $P = 0.3469$ ). In comparing the  
429 strength of modulation across brain regions at early switch points, we found significantly  
430 greater modulation in VS compared to both OFC and DS ( $P < 0.0001$  for both  
431 comparisons). We found no difference between OFC and DS at early switch points ( $P =$   
432  $0.8194$ ), nor did we find any differences between the three regions at late switch points  
433 (OFC:  $P = 0.9855$ , VS:  $P = 0.5200$ , DS:  $P = 0.5564$ ).

434         Taken together with our findings regarding general switch-related activity, the  
435 above results suggest that VS neurons demonstrate greater switch modulation during the  
436 early trial-and-error period of the block compared to the later point of rule acquisition,  
437 and that a portion of these cells carry information about the rule context (i.e. whether the  
438 switch is intradimensional or extradimensional). In contrast, OFC and DS neurons  
439 demonstrate greater switch modulation during the later period of the block, and these  
440 signals carry no information regarding the switch context.

441 *Neurons in the OFC demonstrate associative learning related activity*

442 We next wanted to know how OFC responses reflect learning of associations  
443 between stimuli and outcomes (i.e. reward or no reward), and how these responses relate  
444 to switch modulation. To do this, we examined the neural response to the three probe  
445 stimuli at the beginning of each trial (**Figure 1A**).

446 **Figure 5A** shows the responses of an example OFC neuron with these effects.  
447 This neuron responded weakly to options as they appeared in sequence, but responded  
448 strongly when the correct option appeared. To assess this response statistically, we  
449 calculated the average firing rate during each of the three stimulus presentation epochs on  
450 all correct trials. We then used two-way t-tests to compare the average firing rate during  
451 epochs in which the correct stimulus was presented to the average firing rate during  
452 epochs in which the correct stimulus was not presented, separately for each of the three  
453 presentation epochs. This cell demonstrated a significantly greater firing rate when the  
454 correct stimulus was presented compared to when the correct stimulus was not presented  
455 during all three presentation epochs (first epoch:  $P < 0.0001$ , second epoch:  $P = 0.0048$ ,  
456 third epoch:  $P < 0.0001$ , two-way t-tests).

457 A significant proportion of cells in OFC demonstrated modulation associated with  
458 the presentation of the correct stimulus during all three presentation epochs (first epoch:  
459 35.65%,  $n = 41/115$  cells; second epoch: 46.96%,  $n = 54/115$  cells; third epoch: 49.57%,  
460  $n = 57/115$  cells,  $P < 0.0001$  for all comparisons, binomial tests). Significant percentages  
461 were also observed in VS (first epoch: 45.63%,  $n = 47/103$  cells; second epoch: 47.57%,  
462  $n = 49/103$  cells; third epoch: 50.49%,  $n = 52/103$  cells,  $P < 0.0001$  for all comparisons)

463 and DS (first epoch: 35.47%,  $n = 72/204$  cells; second epoch: 36.95%,  $n = 75/204$  cells;  
464 third epoch: 41.87%,  $n = 85/204$  cells,  $P < 0.0001$  for all comparisons).

465

466 *Associative learning related activity increases after rule acquisition in OFC and DS,*  
467 *but arises early in learning and remains constant across the block in VS*

468 We next examined the average magnitude of correct-stimulus selectivity using  
469 Hedge's  $g$  (a bi-directional effect size measure similar to Cohen's  $d$ , see methods). The  
470 average selectivity across time within trials for the population of OFC cells is shown in  
471 **Figure 5B**. Data for VS and DS are shown as well, for comparison (**Figure 5C and 5D**).  
472 Within trials, we observed that the timing of neural responses in OFC and VS appeared to  
473 arise sooner after the presentation of stimuli compared to DS, which is consistent to the  
474 general pattern we observed for single neurons. Thus, to directly assess the timing of  
475 correct stimulus selectivity, we first determined the average time of maximum selectivity  
476 within trials in each region (averaged across all correct trials and all three presentation  
477 epochs). We found that correct stimulus selectivity peaked 370 ms after the start of the  
478 stimulus presentation period in OFC, 340 ms after the start of the stimulus presentation  
479 period in VS, and 520 ms after the start of the stimulus presentation period in DS. To  
480 determine whether these latencies were significantly different across populations of  
481 neurons, we calculated the time of maximum selectivity across neurons and performed a  
482 one-way ANOVA using the factor brain region (OFC, VS, DS). This analysis revealed a  
483 significant effect of brain region ( $P = 0.0478$ ), which was due to a significantly greater  
484 latency across the population of DS neurons compared to the populations of OFC neurons  
485 ( $P = 0.0442$ , Fisher's LSD Test) and VS neurons ( $P = 0.0466$ , Fisher's LSD Test).

486           We then examined correct stimulus selectivity before and after late switch points  
487 **(Figure 5E)**. Because the populations of OFC, VS, and DS neurons demonstrated  
488 significantly different latencies for correct stimulus selectivity, we calculated the average  
489 selectivity in a 200 ms window surrounding the average time of maximum selectivity for  
490 each population of neurons. We calculated this measure for all correct trials before late  
491 switch points and all correct trials after late switch points, averaged across all three  
492 presentation epochs. We found no difference in the magnitude of selectivity before or  
493 after late switch points in the VS ( $P = 0.5145$ , Fisher's LSD Test), but found a  
494 significantly greater magnitude of selectivity after late switch points compared to before  
495 late switch points in OFC ( $P = 0.0171$ , Fisher's LSD Test) and DS ( $P = 0.0072$ , Fisher's  
496 LSD Test). We also found a significantly greater magnitude of selectivity in OFC  
497 compared to DS prior to late switch points ( $P = 0.0016$ , Fisher's LSD Test) and after late  
498 switch points ( $P = 0.0005$ , Fisher's LSD Test), and a significantly greater magnitude of  
499 selectivity in VS compared to DS prior to late switch points ( $P = 0.0014$ , Fisher's LSD  
500 Test) and after late switch points ( $P = 0.0431$ , Fisher's LSD Test). We found no  
501 difference between OFC and VS at either point (before late switch points:  $P = 0.9312$ ,  
502 Fisher's LSD Test, after late switch points:  $P = 0.1982$ , Fisher's LSD Test).

503           Taken together, the above results indicate that OFC and VS neurons demonstrate  
504 greater correct stimulus selectivity than DS neurons both before and after rule  
505 acquisition, while neurons in both OFC and DS increase selectivity after rule acquisition.  
506 These findings are consistent with our results regarding switch modulation. Specifically,  
507 the populations of OFC and DS neurons both demonstrate greater switch modulation at  
508 the point of rule acquisition compared to early periods of trial and error learning, while



509 both regions also demonstrate an increase in correct stimulus selectivity after rule

510 acquisition.

511

512 **DISCUSSION**

513 In the current study, we describe two new findings based on responses of OFC  
514 neurons in a version of the WCST. First, we show that OFC neurons demonstrate switch-  
515 related modulation. That is, their firing rates change systematically on trials when  
516 monkeys adjust strategies. These signals were observed both on early switches, when  
517 monkeys abandoned their earlier strategy and, more strongly, on late switches, when  
518 monkeys committed to a new strategy. We also observed associative learning signals in  
519 OFC neurons. In other words, we found phasic changes in firing rate associated with the  
520 presentation of the correct option in a sequence of stimuli, which presumably reflect the  
521 learned association between the stimulus and the reward it predicts because of the rule  
522 that is used. These putative associative signals were stronger in OFC following rule  
523 acquisition; this finding echoes our finding that switch signals in OFC are greater at the  
524 point of rule acquisition than at early switch points.

525 While the OFC is sometimes thought of as a purely economic structure, a great  
526 deal of research indicates that it may have executive roles as well; these roles include rule  
527 encoding, working memory for both gustatory and abstract information, conflict-  
528 monitoring, information-seeking and curiosity, and linking outcomes with information  
529 about the spatial world (Blanchard et al., 2015; Kidd and Hayden, 2015; Lara et al., 2009;  
530 Luk and Wallis, 2013; Mansouri et al., 2014; Strait et al., 2016; Tsujimoto et al., 2009;  
531 Wallis and Miller, 2003; Wallis et al., 2001). Our new findings fit in with these ideas.  
532 Taken together, this work suggests that OFC plays an executive role that is  
533 complementary to that of executive dorsal structures, such as the dorsolateral prefrontal  
534 cortex and the dorsal anterior cingulate cortex. We suspect that, while there are

535 differences between these regions, the differences may not be as simple as economic vs.  
536 executive. Instead, they may have to do with variables like informational modality (Lara  
537 et al., 2009).

538         Although several studies suggest that OFC does not contribute to rule-based  
539 switching (Dias et al., 1996a, 1996b, 1997), one recent study suggests it may.  
540 Specifically, a recent study in rodents indicates that OFC lesions disrupt switching  
541 performance (Chase et al., 2012). Our current findings provide confirmatory evidence for  
542 this idea and extend upon it in several ways. First, we show that switching is observed at  
543 the single unit level, and that switching correlates are observed for both early and late  
544 switches. Second, we show that the results are not limited to rodents. Third, our finding  
545 that the strength of associative learning signals in OFC increases following late switch  
546 signals further suggests that switch signals in OFC may play a role in guiding or initiating  
547 stable target identification and selection. Finally, our finding of switch signals in OFC  
548 provides a neural basis for a theory heretofore based solely on behavioral patterns  
549 following lesions.

550         These results complement our recent recordings in DS and VS in the same task. In  
551 our previous study (Sleezer and Hayden, 2016), we found correlates of switching in both  
552 of these regions that resembles those reported here for OFC. We also found correlates of  
553 associative encoding as well. One striking finding is the broad similarity across the  
554 regions. In another study, we also found a similarity in rule encoding in all three regions  
555 (Sleezer et al., 2016). This similarity is reminiscent of a different study using a different  
556 task showing functional overlap between OFC and VS in decision processes related to

557 risky choice (Strait et al., 2016). These results endorse the idea that striatum and its  
558 cortical inputs can, in many cases, have some overlap in their functions.

559         This is not to say that OFC and striatum were strictly identical, even when faced  
560 with the same task. For example, we previously found that VS neurons demonstrate  
561 context-dependent switch signals. In contrast, we did not find context-dependent switch  
562 signals in OFC the present study. In addition, while general switch signals appear to be  
563 stronger in VS when monkeys switch away from previously relevant rules, these signals  
564 in OFC and DS are stronger when monkeys switch to newly relevant rules. These  
565 findings suggest that VS may play a greater role in guiding the identification of newly  
566 relevant rules when the correct rule is uncertain, while OFC and DS may play a greater  
567 role in guiding stable rule selection once the correct rule is known.

568         The present results complement earlier research from several labs showing task-  
569 switching signals in many brain regions, including OFC, striatum, parietal cortex, dorsal  
570 anterior cingulate cortex, and even posterior cingulate cortex (Blanchard and Hayden,  
571 2014; Hayden et al., 2010, 2011; Heilbronner and Hayden, 2016; Kamigaki et al., 2009;  
572 Mansouri et al., 2006; Slezzer and Hayden, 2016). Taken together, this body of work  
573 supports the idea that task-switching is both widespread and distributed, and provides  
574 evidence against the idea that this function is the exclusive domain of a small and highly  
575 specialized piece of brain tissue.

576         The associative encoding signals we found were manifest as an enhanced or  
577 suppressed response to cues that matched the learned rule. This finding is intriguing  
578 because it is the same type of modulation that has previously been linked to target  
579 selection. Specifically, neurons in prefrontal and association cortex show significantly

580 enhanced or suppressed responses to to-be-chosen cues when they appear in a sequence  
581 of options (Chelazzi et al., 1998; Hayden and Gallant, 2013; Lui and Pasternak, 2011;  
582 Mazer and Gallant, 2003). Indeed, what we call rule here would, in such tasks, be called  
583 feature-based attention.

584         The data do not identify the mechanisms by which neurons gain the ability to  
585 discriminate the different offers and respond differently to the one that matches the  
586 current rule. However, the fact that rule encoding and switching are observed in the same  
587 set of neurons that participate in associative encoding raise an interesting possibility.  
588 Perhaps the processes associated with learning the new rule cause a change in the  
589 response properties of the OFC neurons. This change in responsiveness is observable in  
590 the form of tonic changes in firing rate, and these changes are what we call rule encoding  
591 (Sleezer et al., 2016). It is then further observable in the form of its direct effect: changes  
592 in the responses of the neurons to the offers. This idea is borrowed from the literature on  
593 memory-guided decision-making, and is consistent with the idea that rule-based and  
594 memory-based decisions reflect common underlying mechanisms (Chelazzi et al., 1998;  
595 Hayden and Gallant, 2013; Lui and Pasternak, 2011; Machens et al., 2005).

596

597 **Acknowledgements:**

598 This research was supported by a R01 (DA038106), and a Brain and Behavior  
599 Research Foundation NARSAD award to BYH, and by a NIH Training  
600 Fellowship (T32-EY007125) to BJS. We thank Meghan Castagno and Tommy  
601 Blanchard for assistance in data collection and analysis and Marc Mancarella for  
602 general lab assistance.

603

604 **Conflicts of interest:** The authors declare no competing financial interests.

605

606 **Author contributions:** BJS lead the design of the task and designed and performed all  
607 analyses. BJS and BYH wrote the manuscript. GL and MDC supervised the data  
608 collection.

609

610 **Data accessibility statement:** All data will be posted on Figshare and data and code will  
611 be available at [haydenlab.com/data](http://haydenlab.com/data).

## REFERENCES

- 612  
613
- 614 Abe, H., and Lee, D. (2011). Distributed coding of actual and hypothetical outcomes in  
615 the orbital and dorsolateral prefrontal cortex. *Neuron* 70, 731–741.
- 616 Alan, D., Styles, E.A., and Hsieh, S. (1994). Shifting intentional set: Exploring the  
617 dynamic control of tasks. In *Attention and Performance 15: Conscious and Nonconscious*  
618 *Information Processing*, C. Umilt, and M. Moscovitch, eds. (Cambridge, MA, US: The  
619 MIT Press), pp. 421–452.
- 620 Birrell, J.M., and Brown, V.J. (2000). Medial Frontal Cortex Mediates Perceptual  
621 Attentional Set Shifting in the Rat. *J. Neurosci.* 20, 4320–4324.
- 622 Blanchard, T.C., and Hayden, B.Y. (2014). Neurons in dorsal anterior cingulate cortex  
623 signal postdecisional variables in a foraging task. *J. Neurosci. Off. J. Soc. Neurosci.* 34,  
624 646–655.
- 625 Blanchard, T.C., Hayden, B.Y., and Bromberg-Martin, E.S. (2015). Orbitofrontal cortex  
626 uses distinct codes for different choice attributes in decisions motivated by curiosity.  
627 *Neuron* 85, 602–614.
- 628 Buckley, M.J., Mansouri, F.A., Hoda, H., Mahboubi, M., Browning, P.G.F., Kwok, S.C.,  
629 Phillips, A., and Tanaka, K. (2009). Dissociable Components of Rule-Guided Behavior  
630 Depend on Distinct Medial and Prefrontal Regions. *Science* 325, 52–58.
- 631 Chase, E.A., Tait, D.S., and Brown, V.J. (2012). Lesions of the orbital prefrontal cortex  
632 impair the formation of attentional set in rats. *Eur. J. Neurosci.* 36, 2368–2375.
- 633 Chelazzi, L., Duncan, J., Miller, E.K., and Desimone, R. (1998). Responses of neurons in  
634 inferior temporal cortex during memory-guided visual search. *J. Neurophysiol.* 80, 2918–  
635 2940.
- 636 Cohen, J. (1973). Eta-squared and partial eta-squared in fixed factor ANOVA designs.  
637 *Educ. Psychol. Meas.*
- 638 Dias, R., Robbins, T.W., and Roberts, A.C. (1996a). Dissociation in prefrontal cortex of  
639 affective and attentional shifts. *Nature* 380, 69–72.
- 640 Dias, R., Robbins, T.W., and Roberts, A.C. (1996b). Primate analogue of the Wisconsin  
641 Card Sorting Test: effects of excitotoxic lesions of the prefrontal cortex in the marmoset.  
642 *Behav. Neurosci.* 110, 872.
- 643 Dias, R., Robbins, T.W., and Roberts, A.C. (1997). Dissociable forms of inhibitory  
644 control within prefrontal cortex with an analog of the Wisconsin Card Sort Test:  
645 restriction to novel situations and independence from “on-line” processing. *J. Neurosci.*  
646 *Off. J. Soc. Neurosci.* 17, 9285–9297.

- 647 Hayden, B.Y., and Gallant, J.L. (2013). Working memory and decision processes in  
648 visual area v4. *Front Neurosci* 7, 18.
- 649 Hayden, B.Y., Smith, D.V., and Platt, M.L. (2010). Cognitive control signals in posterior  
650 cingulate cortex. *Front. Hum. Neurosci.* 4.
- 651 Hayden, B.Y., Heilbronner, S.R., Pearson, J.M., and Platt, M.L. (2011). Surprise Signals  
652 in Anterior Cingulate Cortex: Neuronal Encoding of Unsigned Reward Prediction Errors  
653 Driving Adjustment in Behavior. *J. Neurosci.* 31, 4178–4187.
- 654 Hedges, L.V. (1981). Distribution Theory for Glass’s Estimator of Effect size and  
655 Related Estimators. *J. Educ. Behav. Stat.* 6, 107–128.
- 656 Heilbronner, S.R., and Hayden, B.Y. (2016). Dorsal Anterior Cingulate Cortex: A  
657 Bottom-Up View. *Annu. Rev. Neurosci. In Press.*
- 658 Kamigaki, T., Fukushima, T., and Miyashita, Y. (2009). Cognitive Set Reconfiguration  
659 Signaled by Macaque Posterior Parietal Neurons. *Neuron* 61, 941–951.
- 660 Kamigaki, T., Fukushima, T., Tamura, K., and Miyashita, Y. (2012). Neurodynamics of  
661 Cognitive Set Shifting in Monkey Frontal Cortex and Its Causal Impact on Behavioral  
662 Flexibility. *J. Cogn. Neurosci.* 24, 2171–2185.
- 663 Kepecs, A., Uchida, N., Zariwala, H.A., and Mainen, Z.F. (2008). Neural correlates,  
664 computation and behavioural impact of decision confidence. *Nature* 455, 227–231.
- 665 Kidd, C., and Hayden, B.Y. (2015). The Psychology and Neuroscience of Curiosity.  
666 *Neuron* 88, 449–460.
- 667 Lara, A.H., Kennerley, S.W., and Wallis, J.D. (2009). Encoding of gustatory working  
668 memory by orbitofrontal neurons. *J. Neurosci.* 29, 765–774.
- 669 Lui, L.L., and Pasternak, T. (2011). Representation of comparison signals in cortical area  
670 MT during a delayed direction discrimination task. *J. Neurophysiol.* 106, 1260–1273.
- 671 Luk, C.-H., and Wallis, J.D. (2013). Choice coding in frontal cortex during stimulus-  
672 guided or action-guided decision-making. *J. Neurosci. Off. J. Soc. Neurosci.* 33, 1864–  
673 1871.
- 674 Machens, C.K., Romo, R., and Brody, C.D. (2005). Flexible control of mutual inhibition:  
675 a neural model of two-interval discrimination. *Science* 307, 1121–1124.
- 676 Mansouri, F.A., Matsumoto, K., and Tanaka, K. (2006). Prefrontal Cell Activities  
677 Related to Monkeys’ Success and Failure in Adapting to Rule Changes in a Wisconsin  
678 Card Sorting Test Analog. *J. Neurosci.* 26, 2745–2756.



- 679 Mansouri, F.A., Buckley, M.J., and Tanaka, K. (2014). The essential role of primate  
680 orbitofrontal cortex in conflict-induced executive control adjustment. *J. Neurosci. Off. J.*  
681 *Soc. Neurosci.* *34*, 11016–11031.
- 682 Mazer, J.A., and Gallant, J.L. (2003). Goal-Related Activity in V4 during Free Viewing  
683 Visual Search: Evidence for a Ventral Stream Visual Saliency Map. *Neuron* *40*, 1241–  
684 1250.
- 685 McAlonan, K., and Brown, V.J. (2003). Orbital prefrontal cortex mediates reversal  
686 learning and not attentional set shifting in the rat. *Behav. Brain Res.* *146*, 97–103.
- 687 Moore, T.L., Killiany, R.J., Herndon, J.G., Rosene, D.L., and Moss, M.B. (2005). A non-  
688 human primate test of abstraction and set shifting: An automated adaptation of the  
689 Wisconsin Card Sorting Test. *J. Neurosci. Methods* *146*, 165–173.
- 690 Öngür, D., and Price, J.L. (2000). The Organization of Networks within the Orbital and  
691 Medial Prefrontal Cortex of Rats, Monkeys and Humans. *Cereb. Cortex* *10*, 206–219.
- 692 Padoa-Schioppa, C., and Assad, J.A. (2006). Neurons in the orbitofrontal cortex encode  
693 economic value. *Nature* *441*, 223–226.
- 694 Paxinos, G., Huang, X.-F., and Toga, A.W. (2000). The rhesus monkey brain in  
695 stereotaxic coordinates.
- 696 Robbins, T. (2007). Shifting and stopping: fronto-striatal substrates, neurochemical  
697 modulation and clinical implications. *Philos. Trans. R. Soc. B Biol. Sci.* *362*, 917–932.
- 698 Rushworth, M.F.S., Noonan, M.P., Boorman, E.D., Walton, M.E., and Behrens, T.E.  
699 (2011). Frontal Cortex and Reward-Guided Learning and Decision-Making. *Neuron* *70*,  
700 1054–1069.
- 701 Schoenbaum, G., Chiba, A.A., and Gallagher, M. (1999). Neural Encoding in  
702 Orbitofrontal Cortex and Basolateral Amygdala during Olfactory Discrimination  
703 Learning. *J. Neurosci.* *19*, 1876–1884.
- 704 Schuck, N.W., Cai, M.B., Wilson, R.C., and Niv, Y. (2016). Human Orbitofrontal Cortex  
705 Represents a Cognitive Map of State Space. *Neuron* *91*, 1402–1412.
- 706 Sleezer, B.J., and Hayden, B.Y. (2016). Differential Contributions of Ventral and Dorsal  
707 Striatum to Early and Late Phases of Cognitive Set Reconfiguration. *J. Cogn. Neurosci.*
- 708 Sleezer, B.J., Castagno, M.D., and Hayden, B.Y. (2016). Rule encoding in orbitofrontal  
709 cortex and striatum guides selection. *J. Neurosci.* *In Press*.
- 710 Strait, C.E., Blanchard, T.C., and Hayden, B.Y. (2014). Reward value comparison via  
711 mutual inhibition in ventromedial prefrontal cortex. *Neuron* *82*, 1357–1366.
- 712

- 713 Strait, C.E., Slezzer, B.J., and Hayden, B.Y. (2015). Signatures of value comparison in  
714 ventral striatum neurons. *PLoS biology*.
- 715 Strait, C.E., Slezzer, B.J., Blanchard, T.C., Azab, H., Castagno, M.D., and Hayden, B.Y.  
716 (2016). Neuronal selectivity for spatial positions of offers and choices in five reward  
717 regions. *J. Neurophysiol.* *115*, 1098–1111.
- 718 Tsujimoto, S., Genovesio, A., and Wise, S.P. (2009). Monkey orbitofrontal cortex  
719 encodes response choices near feedback time. *J. Neurosci.* *29*, 2569–2574.
- 720 Tsujimoto, S., Genovesio, A., and Wise, S.P. (2011). Comparison of Strategy Signals in  
721 the Dorsolateral and Orbital Prefrontal Cortex. *J. Neurosci.* *31*, 4583–4592.
- 722 Wallis, J.D. (2007). Orbitofrontal Cortex and Its Contribution to Decision-Making. *Annu.*  
723 *Rev. Neurosci.* *30*, 31–56.
- 724 Wallis, J.D., and Miller, E.K. (2003). From rule to response: neuronal processes in the  
725 premotor and prefrontal cortex. *J. Neurophysiol.* *90*, 1790–1806.
- 726 Wallis, J.D., Anderson, K.C., and Miller, E.K. (2001). Single neurons in prefrontal cortex  
727 encode abstract rules. *Nature* *411*, 953–956.
- 728 Wilson, R.C., Takahashi, Y.K., Schoenbaum, G., and Niv, Y. (2014). Orbitofrontal  
729 Cortex as a Cognitive Map of Task Space. *Neuron* *81*, 267–279.
- 730 Yamada, M., Pita, M. del C.R., Iijima, T., and Tsutsui, K.I. (2010). Rule-dependent  
731 anticipatory activity in prefrontal neurons. *Neurosci. Res.* *67*, 162–171.
- 732

733

## FIGURES

734

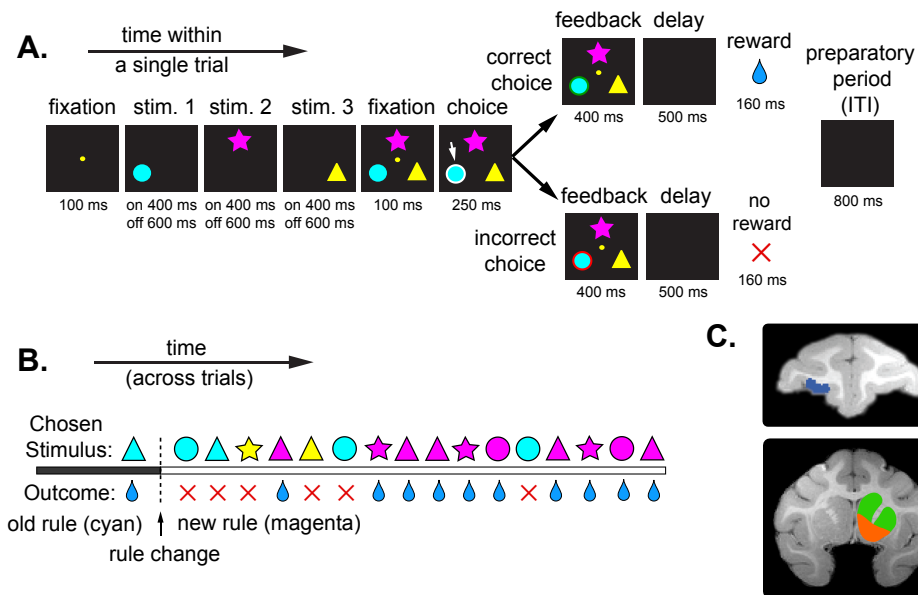

735

### Figure 1. Task and recording locations

736

(A) Timeline of Wisconsin Card Sorting Task. (B) Example block. In this example, the

737

correct rule is magenta. (C) Magnetic resonance image of subject C. Recordings were

738

made in orbitofrontal cortex (highlighted in blue). Comparison sites were in the ventral

739

striatum (highlighted in orange), and dorsal striatum (highlighted in green).

740

741  
742

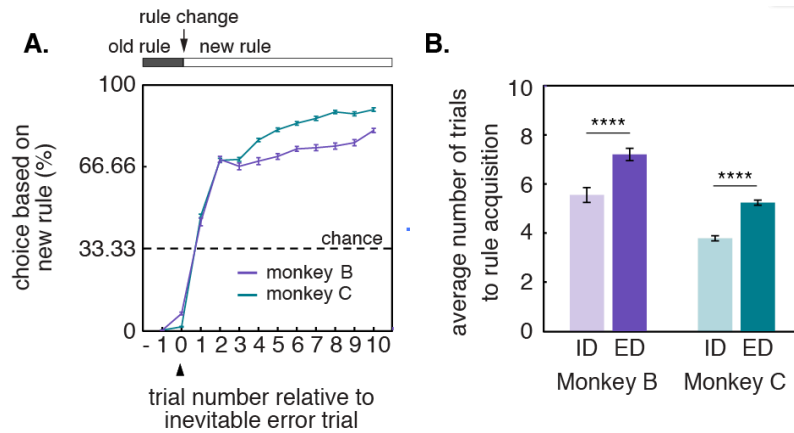

743  
744  
745  
746  
747  
748  
749

**Figure 2. Behavioral performance**

(A) Average choice accuracy on trials surrounding rule changes. (B) Average number of trials to rule acquisition following intra-dimensional (ID) and extra-dimensional (ED) rule changes.

750

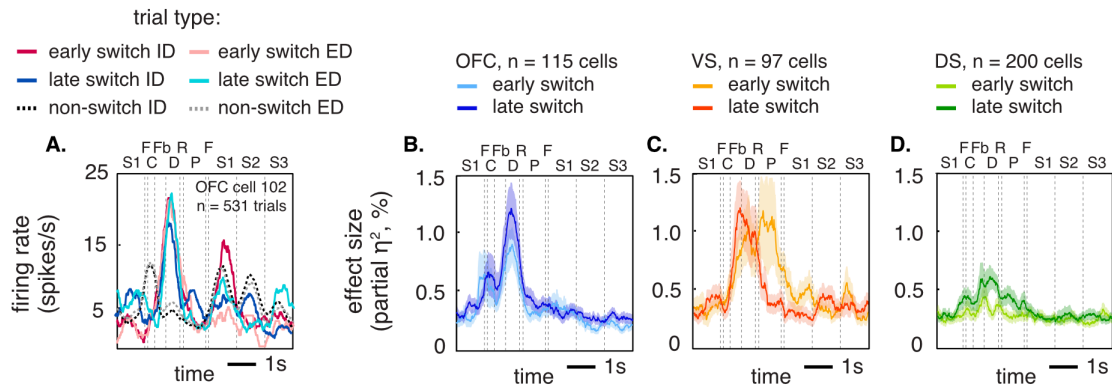

751

752

### Figure 3: General switch modulation

753

754

755

756

757

758

759

760

761

762

763

764

(A) Average response of a single OFC neuron demonstrating general switch-related activity (i.e. a main effect of trial type [switch or non-switch]) at early and late switch points. Red and pink lines indicate intradimensional (ID) and extradimensional (ED) switch trials at early switch points. Blue and light blue lines indicate ID and ED switch trials at late switch points. Black and gray dotted lines indicate ID and ED non-switch trials. C, choice; Fb, feedback; D, delay; R, reward; P, preparatory period (ITI); F, fixation; S1, first stimulus appearance; S2, second stimulus appearance; S3, third stimulus appearance. (B-D) Proportion of variance explained (partial  $\eta^2$ ) across the populations of OFC (B), VS (C), and DS (D) neurons. Effect size measures reflect averages across all neurons (excluding 6 from VS and 4 from DS that were excluded due to an insufficient number of trials).

765

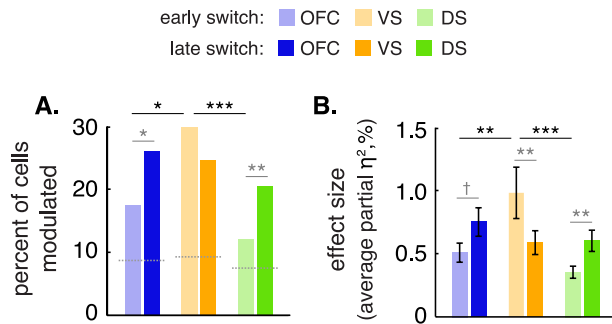

766

767

**Figure 4: General switch modulation at early and late switch points**

768

(A) Proportion of cells demonstrating a significant main effect of trial type at early and late switch points. (B) Proportion of variance explained (partial  $\eta^2$ ) by the main effect of trial type at early and late switch points. OFC (light blue and dark blue bars), VS (light orange and dark orange bars), and DS (light green and dark green lines). Bar graph shows the mean partial  $\eta^2$  ( $\pm$  SEM) during the post feedback period. Black lines and asterisks indicate significant effects across time (i.e. early and late switch points). Gray lines and asterisks indicate significant effects across brain regions. †  $P = 0.0502$ , \*  $P < 0.05$ , \*\*  $P < 0.01$ , \*\*\*  $P < 0.001$

775

776

777

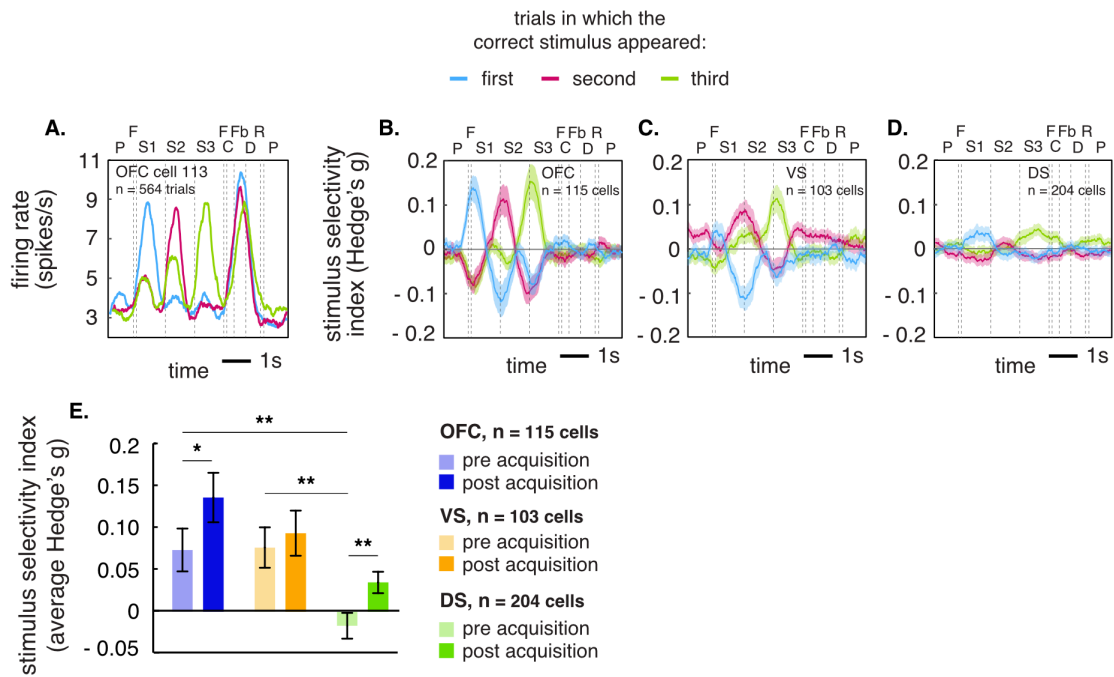

778

779

780 **Figure 5: Correct stimulus selectivity** (A) Average response of a single OFC neuron  
 781 demonstrating selectivity for the presentation of the correct stimulus during the first (blue  
 782 line), second (red line), and third (green line) presentation epochs. C, choice; Fb,  
 783 feedback; D, delay; R, reward; P, preparatory period (ITI); F, fixation; S1, first stimulus  
 784 appearance; S2, second stimulus appearance; S3, third stimulus appearance. (B-D)  
 785 Correct stimulus selectivity (Hedges g) across the populations of OFC (B), VS (C), and  
 786 DS (D) neurons. (E) Average proportion of variance explained (Hedge's g) by the  
 787 presentation of the correct stimulus before late switch points and after late switch points  
 788 for the populations of OFC (light blue and dark blue bars), VS (light orange and dark  
 789 orange bars), and DS (light green and dark green bars) neurons. The analysis epoch for  
 790 each region consists of a 200 ms period surrounding the average time of maximum  
 791 selectivity. Bar graph shows the average Hedge's g ( $\pm$  SEM) during these epochs.  
 792 Selectivity measures reflect averages across all neurons. \*  $P < 0.05$ , \*\*  $P < 0.01$ .
